# Supplementary material for: Genome Sequence of the Edible Cultivated Mushroom Lentinula edodes (Shiitake) Reveals Insights into Lignocellulose Degradation
Source: PLoS One. 2016 Aug 8;11(8):e0160336. doi: 10.1371/journal.pone.0160336 (PMC4976891; doi:10.1371/journal.pone.0160336)
Supplement: S11 Table — (XLS) [file pone.0160336.s016.xls]

## Sheet: Sheet1
Table S11. Gene distribution of CAZyme in Lentinula edodes and the other 25 fungi
species	GH	GT	PL	CE	CBM	AA	Genes	GH0	GH1	GH2	GH3	GH5	GH6	GH7	GH8	GH9	GH10	GH11	GH12	GH13	GH15	GH16	GH17	GH18	GH20	GH23	GH24	GH25	GH26	GH27	GH28	GH29	GH30	GH31	GH32	GH33	GH35	GH36	GH37	GH38	GH39	GH42	GH43	GH44	GH45	GH47	GH49	GH51	GH53
ledo	245	75	9	31	58	85	461	1	3	4	13	21	1	4	0	1	3	2	4	12	7	28	6	13	3	1	0	1	1	6	14	1	4	5	0	0	4	0	2	1	0	0	7	0	0	7	0	3	2
glux	314	86	14	51	100	152	657	1	3	4	15	27	1	7	0	1	5	4	3	12	4	30	4	28	5	1	0	4	0	6	19	1	8	10	0	0	5	0	2	1	1	0	11	1	0	10	0	5	1
mror	319	76	20	63	64	192	688	1	3	4	18	33	5	5	0	1	8	2	5	7	3	35	2	25	2	1	0	1	0	4	13	3	6	7	1	0	6	0	3	1	0	0	16	3	2	9	0	3	1
scom	238	75	16	41	43	79	468	1	3	4	12	16	1	2	0	1	5	1	1	12	3	34	2	15	3	2	0	1	1	1	3	2	5	4	1	0	4	0	2	1	0	0	18	0	1	6	0	2	1
ccin	188	74	13	50	92	122	490	1	2	2	7	25	5	6	0	1	6	6	1	8	3	29	3	9	2	1	6	0	0	0	3	0	3	3	0	0	0	0	2	1	0	0	4	1	0	8	0	1	1
lbic	164	71	7	21	33	50	329	1	0	2	2	20	0	0	0	1	0	0	3	9	2	30	3	11	1	1	3	0	0	1	6	0	7	4	0	0	1	0	2	1	0	0	0	0	0	8	0	0	0
abis	176	55	9	36	51	93	387	1	1	2	8	19	1	1	0	1	2	2	2	6	2	23	3	13	4	1	1	4	0	4	5	1	3	6	0	0	1	0	2	1	0	0	4	1	0	7	0	1	1
vvol	217	62	26	35	88	113	473	1	3	2	11	20	5	11	0	1	18	0	2	9	3	22	3	14	1	1	1	3	0	2	3	0	3	6	0	0	4	0	2	1	0	0	14	1	0	7	0	3	1
post	231	65	23	32	85	131	521	1	3	3	12	21	3	15	0	1	3	2	2	9	3	25	1	12	2	1	3	2	0	6	6	0	2	8	1	0	4	0	2	1	0	0	8	1	2	9	0	3	1
cput	240	59	3	26	33	59	402	1	3	5	13	20	1	2	0	1	3	0	4	5	2	23	1	28	4	1	0	2	0	3	13	4	7	11	1	0	2	0	3	1	0	0	6	0	0	9	0	3	1
slac	165	66	6	20	31	42	313	1	3	2	10	20	1	0	0	1	1	0	2	6	2	19	1	11	2	1	0	1	0	3	7	1	2	5	0	0	3	0	2	1	0	0	2	0	0	5	0	1	1
dsqu	217	67	11	30	50	100	440	1	4	4	8	19	1	3	0	0	5	0	3	8	2	31	1	20	4	1	0	2	0	5	7	0	2	6	2	0	3	0	2	1	0	0	7	1	0	5	0	2	1
gluc	250	66	9	33	62	93	477	1	3	3	11	19	1	3	0	1	7	0	3	8	3	30	1	37	5	1	0	2	0	3	11	0	2	6	1	0	5	0	2	1	0	0	11	0	1	9	0	2	1
tver	220	82	9	25	53	104	449	1	2	5	12	22	1	4	0	1	6	0	5	6	4	29	1	20	5	1	0	1	0	3	10	0	4	5	3	0	2	0	2	1	0	0	3	0	1	5	0	2	1
ppla	143	66	5	13	27	49	287	1	2	3	6	17	0	0	0	0	3	0	2	6	2	22	1	11	3	1	0	0	0	3	8	0	3	4	0	0	1	0	2	1	0	0	1	0	0	5	0	1	1
pchr	182	68	6	26	61	97	397	1	2	2	10	19	1	7	0	1	6	1	2	8	2	21	1	11	4	1	0	1	0	3	5	0	2	6	0	0	3	0	2	1	0	0	4	0	0	5	0	2	1
gtra	197	64	9	23	20	55	355	1	5	4	10	19	0	0	0	1	3	0	2	8	2	27	1	11	4	1	0	2	0	3	10	1	3	5	1	0	2	0	2	1	0	0	5	0	0	4	0	3	2
cneg	98	67	3	7	14	18	200	1	0	0	7	10	0	0	0	1	0	0	0	9	2	11	1	3	1	1	0	0	0	0	1	0	0	3	1	1	0	0	2	1	0	0	0	0	0	3	0	1	0
umay	109	59	1	19	13	30	220	1	0	1	3	12	0	0	1	1	2	1	0	3	1	21	2	4	2	1	0	1	1	1	1	0	2	3	2	0	1	0	2	2	0	1	3	0	3	3	0	2	0
cpar	285	93	10	47	43	98	538	2	3	6	16	15	2	5	0	0	4	4	5	11	2	17	5	10	2	0	1	0	1	4	21	3	3	5	1	1	5	1	1	1	0	1	19	0	0	9	1	2	2
ncra	185	81	4	25	51	68	371	3	1	5	10	6	3	5	0	0	4	2	2	10	2	15	4	12	1	0	0	1	1	0	2	0	2	5	2	0	2	0	2	1	0	0	7	0	1	8	0	1	1
tree	204	91	5	18	41	59	387	2	2	7	13	8	1	2	0	0	1	3	2	4	2	16	4	20	3	0	1	1	0	5	4	0	5	4	0	0	1	1	2	1	1	0	2	0	1	8	0	0	0
anig	247	117	8	29	51	110	520	2	3	6	18	11	2	2	0	0	1	4	4	17	2	12	5	13	3	0	0	0	1	5	20	1	1	7	5	1	5	1	1	1	0	0	9	0	0	5	0	3	2
snod	248	86	10	53	56	129	541	2	2	10	15	19	4	5	0	0	7	7	3	6	3	14	6	12	3	0	0	0	0	2	4	0	2	10	4	0	4	1	2	1	0	0	13	0	2	9	0	2	1
psti	76	81	0	5	8	13	177	4	0	3	8	7	0	0	0	0	1	0	0	6	1	6	5	4	1	0	0	0	0	0	0	0	0	3	0	0	0	0	1	1	0	0	0	0	0	2	0	0	0
scer	54	66	0	3	10	10	137	5	0	0	0	5	0	0	0	0	0	0	0	9	1	3	4	2	0	0	0	0	0	0	1	0	0	1	1	0	0	0	2	1	0	0	0	0	0	3	0	0	0
Note: agaricales is marked by red color, and polyporales is markd by green color.
[truncated: 139 more columns]
